# Supplementary material for: Continuous Inflammatory Stimulation Leads via Metabolic Plasticity to a Prometastatic Phenotype in Triple-Negative Breast Cancer Cells
Source: MDPI journal article supplement (doi:10.3390/cells10061356), 2021-05-31
Supplement: s1 [file s1]

Figure S1

**A. Vimentin**

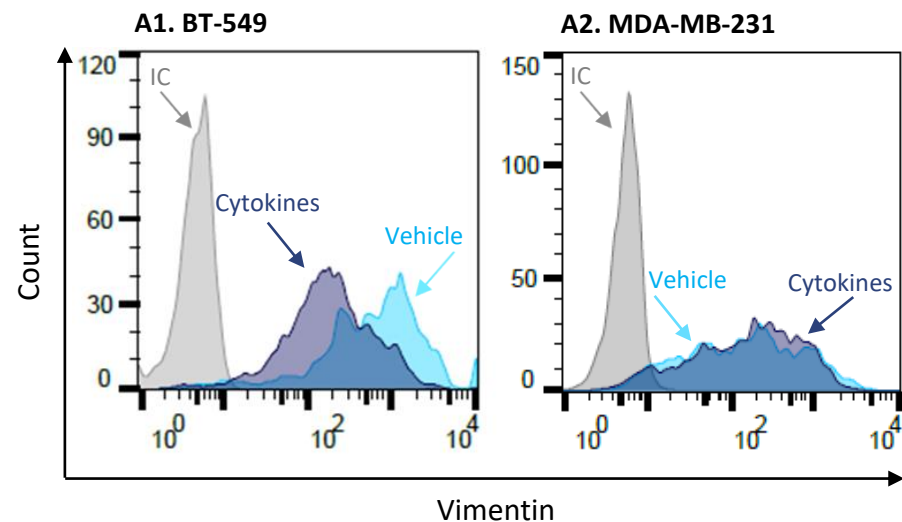

**B. E-cadherin**

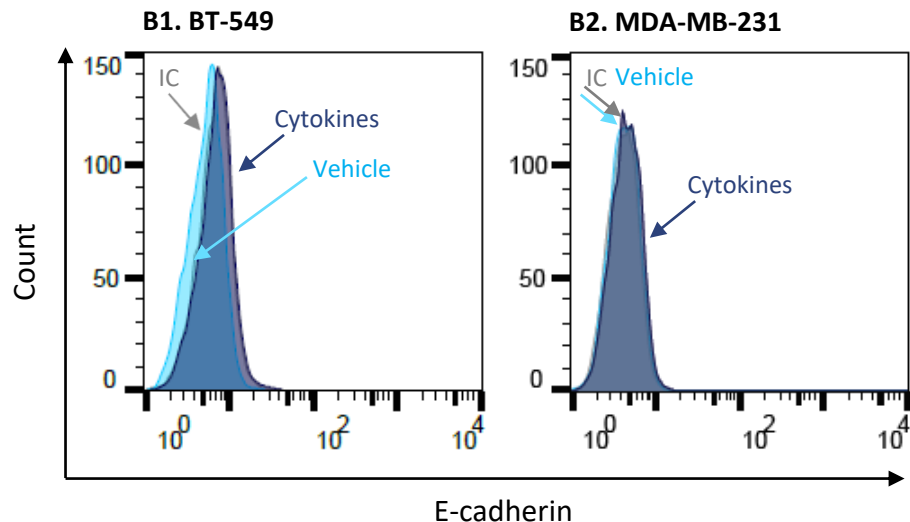

**Expression of EMT markers by TNBC cells stimulated continuously by proinflammatory cytokines**

BT-549 and MDA-MB-231 cells were continuously stimulated by  $\text{TNF}\alpha$  +  $\text{IL-1}\beta$ , or treated by vehicle control (as described in Fig. 1). Expression of EMT markers was determined by flow cytometry. **(A)** Vimentin levels. Representative experiments of  $n \geq 3$  for (A1) BT-549 cells and (A2) MDA-MB-231 cells are presented. **(B)** E-cadherin levels. Representative experiments of  $n \geq 3$  for (B1) BT-549 and (B2) MDA-MB-231 cells are presented. IC, Non-relevant isotype control.

Figure S2

**A. BT-549: Migration**

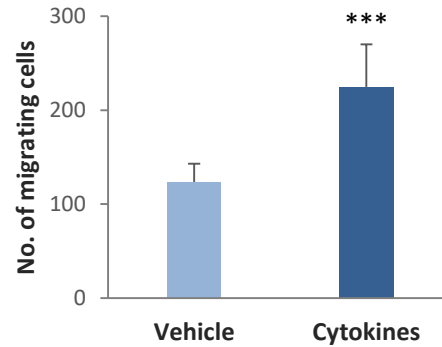

**B. MDA-MB-231: Migration**

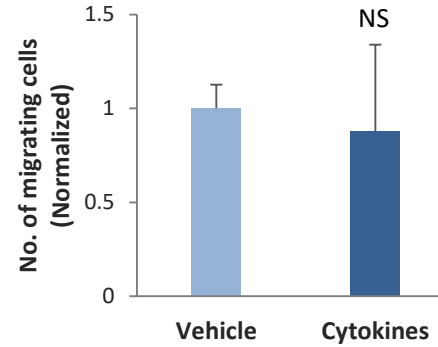

**Migration of TNBC cells that have been continuously stimulated by proinflammatory cytokines**

BT-549 **(A)** and MDA-MB-231 **(B)** cells were continuously stimulated by  $\text{TNF}\alpha$  +  $\text{IL-1}\beta$ , or treated by vehicle control (as described in Fig. 1). Cell migration was determined in fibronectin-coated transwells in response to serum proteins. The migration of BT-549 cells is demonstrated as a representative experiment of  $n>3$ . The migration of MDA-MB-231 cells is demonstrated as the average of  $n=5$  experiments, in which the value of vehicle-treated cells was given the value of 1. \*\*\* $p<0.001$ , NS, Not significant.

Figure S3

**A. OXPHOS: BT-549 – Short stimulation**

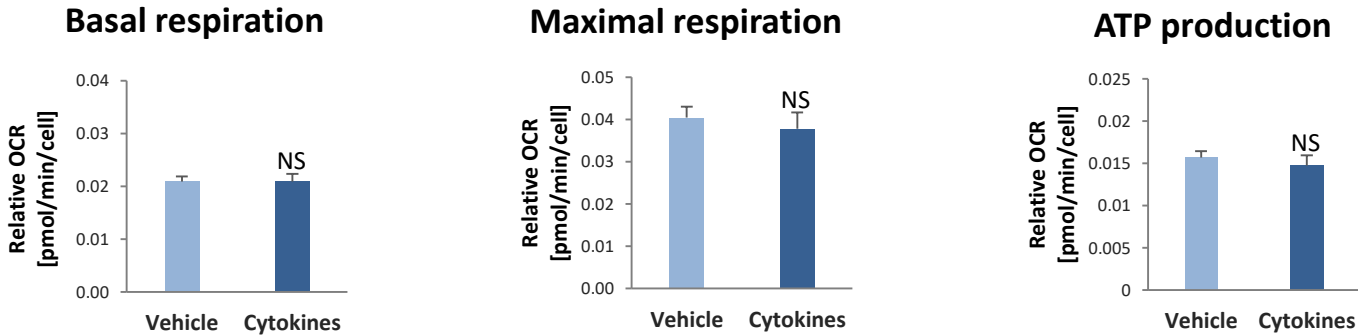

**B. OXPHOS: MDA-MB-231 – Short stimulation**

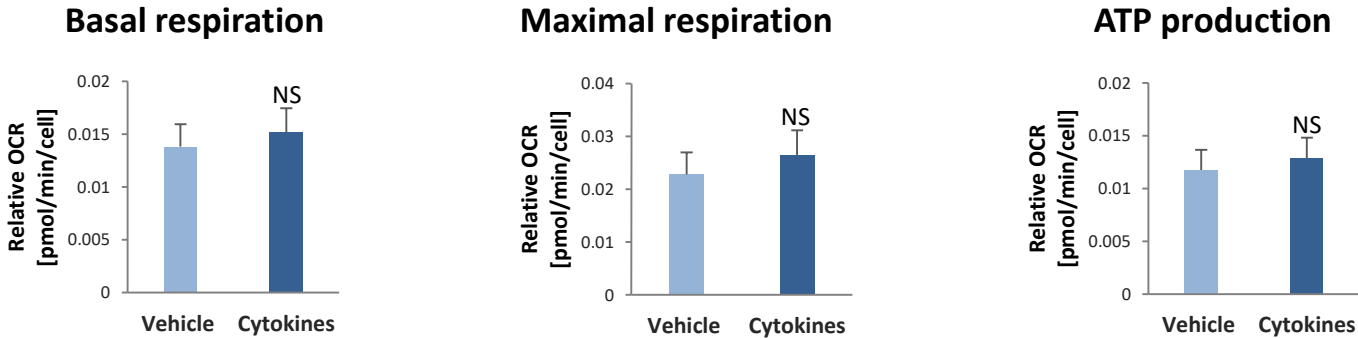

**Short-term TNF $\alpha$  + IL-1 $\beta$  stimulation does not increase OXPHOS in TNBC cells**

BT-549 and MDA-MB-231 cells were exposed to short-term stimulation (48 hours) by TNF $\alpha$  + IL-1 $\beta$ , or treated by vehicle control (as described in Fig. 1). OXPHOS activities were determined by the seahorse technology. The results of a representative experiment of n>3 are presented. NS, Not significant.

Figure S4

**A. Extracellular lactate**

**A1. BT-549**

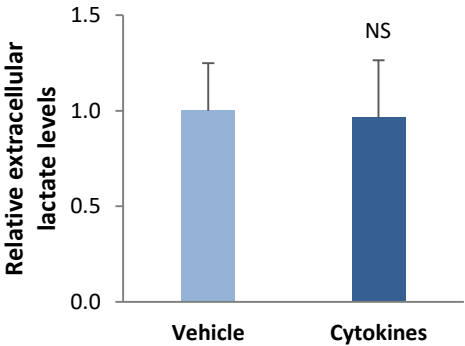

**A2. MDA-MB-231**

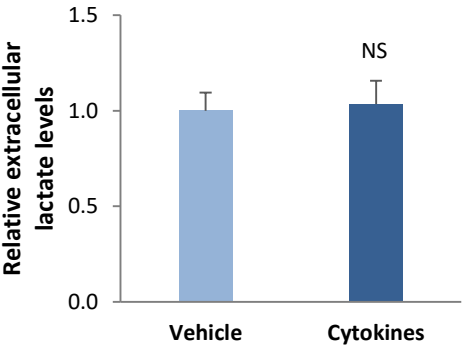

**B. ATP**

**B1. BT-549**

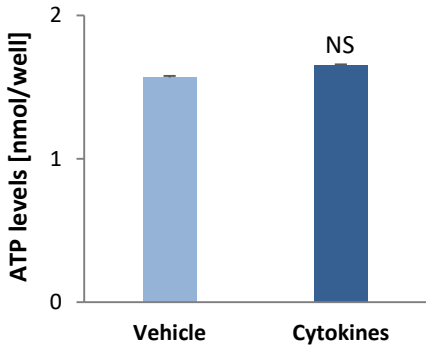

**B2. MDA-MB-231**

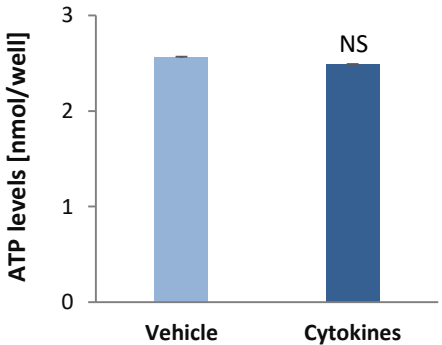

**Levels of extracellular lactate and ATP in TNBC cells continuously stimulated by proinflammatory cytokines**

BT-549 and MDA-MB-231 cells were continuously stimulated by  $\text{TNF}\alpha$  +  $\text{IL-1}\beta$ , or treated by vehicle control (as described in Fig. 1). **(A)** Extracellular levels of lactate were measured in CM. The results are demonstrated as the average of  $n=3$  experiments, in which the value of vehicle-treated cells was given the value of 1. **(B)** ATP levels were determined in cell lysates. The results of a representative experiment of  $n=3$  are presented. NS, Not significant.

Figure S5

## Inflammatory mediators: OXPHOS inhibition

### Protein level

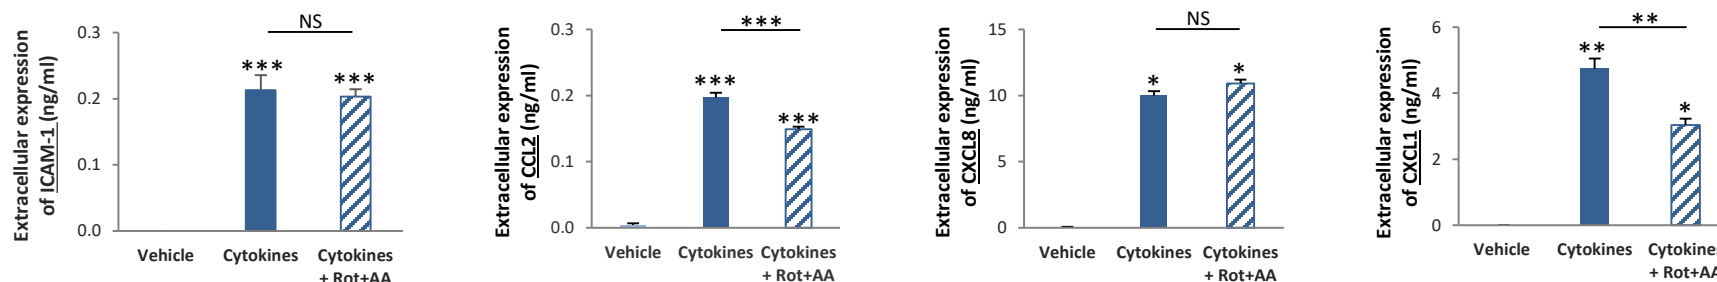

### OXPHOS activities do not regulate the expression of inflammatory mediators that are induced by continuous cytokine stimulation in TNBC cells

MDA-MB-231 cells were continuously stimulated by  $\text{TNF}\alpha$  +  $\text{IL-1}\beta$ , or treated by vehicle control (as described in Fig. 1). Protein levels of pro-inflammatory mediators were determined as described in “Materials and methods”; they were determined by ELISA and are presented relative to cell numbers. The results of a representative experiment of  $n=3$  are presented. \*\*\* $p<0.001$ , \*\* $p<0.01$ , \* $p<0.05$ . NS, Not significant.

Table S1

| Gene  | Sense primer (5'-3') | Anti-sense primer (5'-3') |
|-------|----------------------|---------------------------|
| ICAM1 | GATGGGCAGTCAACAGCTAA | AGCGTAGGGTAAGGTTCTTG      |
| CXCL8 | TTCTGCAGCTCTGTGTGAAG | CAGTGTGGTCCACTCTCAAT      |
| CXCL1 | GCGCAGCAGGAGCGTCCGT  | ATGCAGGATTGAGGCAAGCTTTC   |
| CCL2  | AGTCTCTGCCGCCCTTCT   | GTGACTGGGGCATTGATTG       |
| RS9   | AACTTATGTGACCCCGCGGA | CAGCTTCAGCTCTTGGTCGA      |

Primers used for quantitative RT-PCR analysis.

Table S2

| Category                | “Diseases and Functions” annotations | p-value  | Activation z-score | No. of genes in annotation |
|-------------------------|--------------------------------------|----------|--------------------|----------------------------|
| Tumor progression       | Advanced malignant tumor             | 6.21E-16 | 2.01               | 126                        |
|                         | Advanced stage tumor                 | 3.02E-16 | 2.01               | 127                        |
|                         | Cancer                               | 2.54E-33 | 2.48               | 765                        |
|                         | Cancer of cells                      | 3.33E-17 | 2.64               | 395                        |
|                         | Development of carcinoma             | 6.02E-23 | 2.25               | 593                        |
|                         | Development of malignant tumor       | 5.46E-26 | 2.43               | 605                        |
|                         | Formation of solid tumor             | 4.22E-32 | 2.28               | 686                        |
|                         | Frequency of tumor                   | 2.1E-25  | 2.27               | 608                        |
|                         | Growth of solid tumor                | 3.48E-07 | 2.31               | 36                         |
|                         | Neoplasia of cells                   | 1.77E-15 | 2.33               | 426                        |
| Angiogenesis            | Development of vasculature           | 6.33E-13 | 3.11               | 114                        |
|                         | Vasculogenesis                       | 3.54E-08 | 2.44               | 78                         |
|                         | Angiogenesis                         | 1.31E-11 | 3.11               | 102                        |
|                         | Angiogenesis of lesion               | 2.79E-07 | 2.30               | 20                         |
| Myeloid cell activation | Activation of myeloid cells          | 7.01E-06 | 2.12               | 29                         |
| Lipid metabolism        | Concentration of fatty acid          | 2.57E-08 | 2.25               | 38                         |
|                         | Concentration of lipid               | 1.82E-07 | 2.12               | 78                         |

**Continuous TNFα + IL-1β stimulation increases cancer-related annotations in BT-549 cells**

BT-549 cells were continuously stimulated by TNFα + IL-1β, or treated by vehicle control (as described in Fig. 1). Transcriptome analysis was performed as described in Figure 2. Differentially expressed genes (cutoff: FC≥2 or FC≤-2, pFDR<0.05) were subjected to Ingenuity pathway analysis (as described in Figure 2). The Table presents significantly up-regulated annotations (z-score>2) divided into cancer-related categories.

Table S3

| Category            | “Diseases and Functions” annotations      | p-value    | Activation z-score | No. of genes in annotation |
|---------------------|-------------------------------------------|------------|--------------------|----------------------------|
| Tumor progression   | Proliferation of tumor cells              | 7.61E-08   | 2.7                | 33                         |
|                     | Proliferation of cancer cells             | 0.00000082 | 2.4                | 26                         |
|                     | Mammary tumor                             | 0.00000032 | 2.0                | 184                        |
| Inflammation        | Interaction of leukocytes                 | 5.47E-07   | 2.1                | 35                         |
|                     | Inflammatory response                     | 3.28E-12   | 3.0                | 76                         |
|                     | Homing of leukocytes                      | 1.4E-10    | 2.5                | 43                         |
|                     | Binding of blood cells                    | 1.52E-07   | 2.1                | 39                         |
|                     | Activation of leukocytes                  | 3.64E-09   | 3.6                | 56                         |
|                     | Activation of blood cells                 | 3.69E-09   | 3.0                | 61                         |
| Leukocyte migration | Transmigration of leukocytes              | 3.19E-09   | 2.1                | 22                         |
|                     | Migration of phagocytes                   | 1.47E-07   | 2.0                | 30                         |
|                     | Migration of mononuclear leukocytes       | 1.37E-08   | 2.1                | 40                         |
|                     | Leukocyte migration                       | 4.8E-18    | 2.1                | 103                        |
|                     | Infiltration by neutrophils               | 1.92E-09   | 2.3                | 26                         |
|                     | Chemotaxis of phagocytes                  | 5.71E-07   | 2.8                | 30                         |
|                     | Chemotaxis of neutrophils                 | 0.00000049 | 2.6                | 20                         |
|                     | Chemotaxis of myeloid cells               | 3.04E-07   | 2.5                | 30                         |
|                     | Chemotaxis of leukocytes                  | 8.79E-10   | 2.7                | 40                         |
|                     | Chemotaxis of granulocytes                | 0.00000169 | 2.2                | 21                         |
|                     | Cellular infiltration by phagocytes       | 2.9E-10    | 2.8                | 37                         |
|                     | Cellular infiltration by myeloid cells    | 1.42E-09   | 2.6                | 38                         |
|                     | Cellular infiltration by granulocytes     | 2.24E-08   | 2.1                | 28                         |
|                     | Cellular infiltration                     | 2.51E-11   | 2.3                | 54                         |
|                     | Cell movement of T lymphocytes            | 0.00000181 | 2.1                | 26                         |
|                     | Cell movement of phagocytes               | 7.1E-12    | 2.7                | 62                         |
|                     | Cell movement of neutrophils              | 5.08E-13   | 2.7                | 44                         |
|                     | Cell movement of myeloid cells            | 4.95E-12   | 2.6                | 62                         |
|                     | Cell movement of mononuclear leukocytes   | 2E-09      | 2.4                | 49                         |
|                     | Cell movement of lymphatic system cells   | 4.33E-09   | 2.0                | 44                         |
|                     | Cell movement of leukocytes               | 3.83E-17   | 2.3                | 90                         |
|                     | Cell movement of granulocytes             | 3.04E-11   | 2.2                | 46                         |
| Lipid metabolism    | Synthesis of lipid                        | 4.97E-08   | 3.3                | 67                         |
|                     | Synthesis of fatty acid                   | 6.76E-08   | 2.5                | 33                         |
|                     | Synthesis of eicosanoid                   | 4.33E-08   | 2.9                | 26                         |
|                     | Metabolism of polyunsaturated fatty acids | 3.68E-08   | 3.0                | 29                         |
|                     | Metabolism of eicosanoid                  | 8.22E-08   | 3.0                | 28                         |
|                     | Fatty acid metabolism                     | 4.88E-07   | 2.2                | 49                         |

**Continuous TNFα + IL-1β stimulation increases cancer-related annotations in MDA-MB-231 cells**

MDA-MB-231 cells were continuously stimulated by TNFα + IL-1β, or treated by vehicle control (as described in Fig. 1). Transcriptome analysis was performed as described in Figure 2. Differentially expressed genes (cutoff: FC≥2 or FC≤-2, pFDR<0.05) were subjected to Ingenuity pathway analysis (as described in Figure 2). The Table presents significantly up-regulated annotations (z-score>2) divided into cancer-related categories.

A. Shared up-regulated genes

| Gene     | BT-549<br>fold change | MDA MB-231<br>fold change | BT-549<br>p-value | MDA-MB-231<br>p-value |
|----------|-----------------------|---------------------------|-------------------|-----------------------|
| OLR1     | 1021.3                | 43.6                      | 0.002             | 0.001                 |
| IL24     | 434.2                 | 11.3                      | 0.000             | 0.001                 |
| C1QTNF1  | 101.9                 | 7.0                       | 0.004             | 0.005                 |
| IL1A     | 97.5                  | 13.0                      | 0.001             | 0.001                 |
| TEPP     | 41.2                  | 2.7                       | 0.000             | 0.002                 |
| CLDN3    | 30.8                  | 2.2                       | 0.005             | 0.001                 |
| TFPI2    | 30.0                  | 2.6                       | 0.004             | 0.000                 |
| MAP3K8   | 25.4                  | 3.2                       | 0.002             | 0.000                 |
| TNFAIP3  | 24.5                  | 2.6                       | 0.000             | 0.000                 |
| GAL      | 20.4                  | 4.1                       | 0.001             | 0.002                 |
| LRIG1    | 11.5                  | 2.8                       | 0.005             | 0.000                 |
| ASS1     | 10.8                  | 2.7                       | 0.003             | 0.002                 |
| IGSF3    | 7.7                   | 4.1                       | 0.000             | 0.000                 |
| CLDN1    | 5.1                   | 5.4                       | 0.002             | 0.004                 |
| ELOVL7   | 5.0                   | 2.2                       | 0.001             | 0.001                 |
| AKR1B1   | 4.3                   | 3.1                       | 0.001             | 0.000                 |
| CXCL1    | 4.1                   | 25.1                      | 0.004             | 0.005                 |
| SLC16A1  | 3.7                   | 3.0                       | 0.000             | 0.005                 |
| WWC1     | 3.4                   | 3.6                       | 0.001             | 0.000                 |
| MMP15    | 3.2                   | 2.9                       | 0.002             | 0.001                 |
| SLC22A23 | 3.1                   | 3.5                       | 0.004             | 0.000                 |
| MARCH3   | 2.9                   | 2.6                       | 0.003             | 0.004                 |
| VDR      | 2.8                   | 2.2                       | 0.001             | 0.004                 |
| ADAP2    | 2.7                   | 5.1                       | 0.002             | 0.000                 |

B. Shared down-regulated genes

| Gene     | BT-549<br>fold change | MDA MB-231<br>fold change | BT-549<br>p-value | MDA-MB-231<br>p-value |
|----------|-----------------------|---------------------------|-------------------|-----------------------|
| APOBEC3G | -69.7                 | -2.6                      | 0.003             | 0.004                 |
| RSAD2    | -64.9                 | -2.5                      | 0.003             | 0.001                 |
| CHRD1    | -44.3                 | -2.7                      | 0.000             | 0.004                 |
| NDP      | -38.0                 | -4.5                      | 0.001             | 0.002                 |
| PLEKHG4B | -31.4                 | -34.2                     | 0.003             | 0.001                 |
| IFIT2    | -30.0                 | -2.0                      | 0.002             | 0.005                 |
| OASL     | -27.8                 | -2.6                      | 0.002             | 0.003                 |
| SAMD9L   | -15.4                 | -2.5                      | 0.003             | 0.002                 |
| CMPK2    | -15.0                 | -8.1                      | 0.000             | 0.003                 |
| KAZALD1  | -14.8                 | -2.1                      | 0.000             | 0.003                 |
| PDE1C    | -10.0                 | -4.4                      | 0.001             | 0.001                 |
| ITGA10   | -9.8                  | -9.6                      | 0.000             | 0.000                 |
| EPHA5    | -7.2                  | -6.7                      | 0.000             | 0.000                 |
| HOPX     | -5.0                  | -6.9                      | 0.001             | 0.004                 |
| AIM1     | -4.3                  | -2.6                      | 0.000             | 0.000                 |
| GPSM3    | -3.2                  | -2.0                      | 0.001             | 0.002                 |
| TIMP3    | -3.0                  | -2.8                      | 0.002             | 0.001                 |
| PYGB     | -2.9                  | -2.3                      | 0.001             | 0.000                 |
| MAP2K6   | -2.9                  | -2.6                      | 0.002             | 0.001                 |
| SOCS3    | -2.7                  | -2.1                      | 0.000             | 0.003                 |
| SLC4A8   | -2.6                  | -4.6                      | 0.002             | 0.001                 |
| EHD3     | -2.4                  | -2.4                      | 0.000             | 0.005                 |
| AFF3     | -2.4                  | -7.8                      | 0.003             | 0.000                 |

Genes that are regulated similarly by continuous TNFα + IL-1β in BT-549 and MDA-MB-231 TNBC cells

BT-549 and MDA-MB-231 cells were continuously stimulated by TNFα + IL-1β, or treated by vehicle control (as described in Fig. 1). Transcriptome analyses were performed as described in Figure 2. **(A)** Shared up-regulated genes (FC≥2, pFDR<0.05). **(B)** Shared down-regulated genes (FC≤-2, pFDR<0.05) are demonstrated.

Table S5

**A. BT-549:**  
**30 top up-regulated genes**

| Gene    | Fold change | p-value |
|---------|-------------|---------|
| CSF3    | 1971.8      | 0.000   |
| S100A9  | 1449.1      | 0.001   |
| OLR1    | 1021.3      | 0.002   |
| IL24    | 434.2       | 0.000   |
| IL1B    | 290.2       | 0.001   |
| TNFAIP6 | 215.9       | 0.002   |
| SLPI    | 150.2       | 0.001   |
| IL26    | 147.6       | 0.003   |
| GCSAM   | 114.2       | 0.004   |
| BCL2A1  | 112.2       | 0.000   |
| C1QTNF1 | 101.9       | 0.004   |
| IL1A    | 97.5        | 0.001   |
| PTGS2   | 91.4        | 0.003   |
| DNER    | 81.0        | 0.001   |
| CYP39A1 | 71.4        | 0.004   |
| PTGES   | 65.8        | 0.001   |
| BMP6    | 64.5        | 0.003   |
| TPBGL   | 54.1        | 0.003   |
| TNS4    | 51.8        | 0.001   |
| CXCL6   | 50.9        | 0.000   |
| VNN3    | 49.9        | 0.000   |
| SPOCD1  | 46.9        | 0.002   |
| CACNA1A | 45.0        | 0.002   |
| PTPRD   | 41.5        | 0.001   |
| TEPP    | 41.2        | 0.000   |
| PLAT    | 37.5        | 0.002   |
| DYSF    | 36.1        | 0.005   |
| FEZ1    | 34.0        | 0.002   |
| WNK4    | 33.4        | 0.001   |
| CHI3L2  | 33.0        | 0.000   |

**B. MDA-MB-231:**  
**30 top up-regulated genes**

| Gene     | Fold change | p-value |
|----------|-------------|---------|
| HLA-DQA1 | 291.5       | 0.003   |
| NOD2     | 124.6       | 0.000   |
| HLA-DQA2 | 112.2       | 0.000   |
| LCN2     | 109.7       | 0.002   |
| SLC27A2  | 100.6       | 0.000   |
| PDZK1IP1 | 68.4        | 0.000   |
| AZGP1    | 52.2        | 0.001   |
| OLR1     | 43.6        | 0.001   |
| WNT10A   | 40.8        | 0.000   |
| MMP9     | 39.3        | 0.005   |
| ALOX5AP  | 37.9        | 0.006   |
| KCNN3    | 33.5        | 0.001   |
| SAA4     | 30.3        | 0.001   |
| C3       | 28.1        | 0.000   |
| CXCL1    | 25.1        | 0.005   |
| BDKRB2   | 24.3        | 0.003   |
| VNN1     | 23.2        | 0.001   |
| MFSD4A   | 22.2        | 0.003   |
| HLA-DQB1 | 20.6        | 0.000   |
| GBP5     | 20.5        | 0.004   |
| NDRG2    | 18.8        | 0.000   |
| CYP4X1   | 17.6        | 0.006   |
| SAA2     | 17.0        | 0.000   |
| SAA1     | 13.6        | 0.000   |
| IL1A     | 13.0        | 0.001   |
| C4orf26  | 12.7        | 0.000   |
| TNIP3    | 11.9        | 0.001   |
| HLA-DOA  | 11.7        | 0.000   |
| CHST4    | 11.5        | 0.000   |
| IL24     | 11.3        | 0.001   |

**Top 30 up-regulated genes in TNBC cells following continuous TNFα + IL-1β stimulation**

BT-549 and MDA-MB-231 cells were continuously stimulated by TNFα + IL-1β, or treated by vehicle control (as described in Fig. 1). Transcriptome analyses were performed as described in Figure 2. Tables of the top 30 up-regulated genes (cutoff: FC≥2, pFDR<0.05) are presented for **(A)** BT-549 and **(B)** MDA-MBA-231.

Table S6

**A. BT-549:**  
**30 top down-regulated genes**

| Gene     | Fold change | p-value |
|----------|-------------|---------|
| LUZP2    | -478.3      | 0.000   |
| BST2     | -340.5      | 0.001   |
| SDPR     | -206.9      | 0.003   |
| IFITM1   | -143.2      | 0.000   |
| RGS4     | -104.0      | 0.004   |
| CHRM3    | -104.0      | 0.003   |
| FMN1     | -78.4       | 0.001   |
| MX1      | -73.9       | 0.002   |
| KCNK3    | -69.9       | 0.000   |
| APOBEC3G | -69.7       | 0.003   |
| RSAD2    | -64.9       | 0.003   |
| DKK3     | -52.9       | 0.002   |
| LGALS3BP | -52.3       | 0.001   |
| TM4SF18  | -48.9       | 0.000   |
| ELFN1    | -48.2       | 0.001   |
| IL15RA   | -45.2       | 0.000   |
| CHRD1    | -44.3       | 0.000   |
| CDH11    | -43.1       | 0.002   |
| GIMAP2   | -42.3       | 0.002   |
| HNFB4G   | -39.4       | 0.000   |
| NDP      | -38.0       | 0.001   |
| DEF6     | -31.5       | 0.001   |
| PLEKHG4B | -31.4       | 0.003   |
| SH3TC2   | -31.0       | 0.001   |
| IFIT2    | -30.0       | 0.002   |
| PCDHGC5  | -28.9       | 0.000   |
| GBP3     | -28.1       | 0.004   |
| OASL     | -27.8       | 0.002   |
| IFI30    | -26.5       | 0.000   |
| CDK15    | -26.4       | 0.001   |

**B. MDA-MB-231:**  
**30 top down-regulated genes**

| Gene     | Fold change | p-value |
|----------|-------------|---------|
| HOXC5    | -6160550.0  | 0.004   |
| HSD3B1   | -172.4      | 0.003   |
| SLC30A10 | -42.4       | 0.000   |
| PLEKHG4B | -34.2       | 0.001   |
| S100P    | -31.8       | 0.000   |
| ID4      | -25.7       | 0.002   |
| PCDH18   | -21.9       | 0.000   |
| MGMT     | -21.7       | 0.002   |
| GAS7     | -21.3       | 0.000   |
| TFF1     | -19.9       | 0.000   |
| SLC14A1  | -19.8       | 0.002   |
| NCALD    | -18.4       | 0.002   |
| KIF6     | -18.1       | 0.005   |
| RAB37    | -18.0       | 0.001   |
| C5orf46  | -14.8       | 0.002   |
| AGR2     | -14.7       | 0.001   |
| LAIR2    | -14.5       | 0.000   |
| PROX1    | -14.2       | 0.000   |
| FAM110B  | -13.8       | 0.000   |
| C9orf152 | -13.7       | 0.001   |
| PCDH88   | -13.7       | 0.005   |
| RERG     | -13.4       | 0.002   |
| TSPAN8   | -12.4       | 0.000   |
| ADGRG2   | -12.3       | 0.000   |
| NPR3     | -10.9       | 0.000   |
| SHISA3   | -10.8       | 0.001   |
| BMP2     | -10.3       | 0.002   |
| ATP10A   | -10.3       | 0.001   |
| INHBB    | -10.3       | 0.000   |
| SOX4     | -10.3       | 0.000   |

**Top 30 down-regulated genes in TNBC cells following continuous TNFα + IL-1β stimulation**  
BT-549 and MDA-MB-231 cells were continuously stimulated by TNFα + IL-1β, or treated by vehicle control (as described in Fig. 1). Transcriptome analyses were performed as described in Figure 2. Tables of the top 30 down-regulated genes (cutoff: FC≤-2, pFDR<0.05) are presented for **(A)** BT-549 and **(B)** MDA-MBA-231.

Table S7

**A. MDA-MB-231: 15 min of stimulation**

|        | Arbitrary phosphorylation values<br>(Normalized) |           |
|--------|--------------------------------------------------|-----------|
|        | Vehicle                                          | Cytokines |
| Exp. 1 | 1.96                                             | 16.39     |
| Exp. 2 | 0.42                                             | 1.66      |
| Exp. 3 | 0.62                                             | 3.15      |

**B. MDA-MB-231: 24 hours of stimulation**

|        | Arbitrary phosphorylation values (Normalized) |                  |                    |
|--------|-----------------------------------------------|------------------|--------------------|
|        | Cytokines                                     | Cytokines + 2-DG | Cytokines + Rot+AA |
| Exp. 1 | 1.02                                          | 0.38             | 0.46               |
| Exp. 2 | 0.85                                          | 0.42             | 0.64               |
| Exp. 3 | 1.13                                          | 0.80             | 1.02               |

**Continuous TNF $\alpha$  + IL-1 $\beta$  stimulation induces a glycolysis-dependent process of p65 activation in MDA-MB-231 cells**

The Table complements the data demonstrated in Figure 9.

MDA-MB-231 cells were continuously stimulated by TNF $\alpha$  + IL-1 $\beta$ , or treated by vehicle control (as described in Fig. 1).

**(A)** p65 phosphorylation following 15 minutes of treatment by TNF $\alpha$  + IL-1 $\beta$  or vehicle. The Table demonstrates the normalized arbitrary phosphorylation values obtained by densitometry for each treatment in the different experiments, where the average of vehicle-treated cells was given the value of 1. **(B)** p65 phosphorylation following 24 hours of treatment by TNF $\alpha$  + IL-1 $\beta$  in the presence of glycolysis inhibitor (2-DG) or OXPHOS inhibitors (Rot+AA), or their solubilizer. The Table demonstrates the normalized arbitrary phosphorylation units obtained by densitometry for each treatment in the different experiments, where the average of the cytokines (without inhibitors)-stimulated cells was given the value of 1.
